# Genetic Relationships of Grizzly Bears (*Ursus arctos*) in the Prudhoe Bay Region of Alaska: Inference from Microsatellite DNA, Mitochondrial DNA, and Field Observations

M. Cronin, R. Shideler, J. Hechtel, C. Strobeck, and D. Paetkau

**Grizzly bears are abundant in the region of the Prudhoe Bay oil fields in northern Alaska. We used field observations and molecular genetic data to identify parent-offspring and sibling relationships among bears in this region. We determined genotypes at 14 microsatellite DNA loci and the cytochrome *b* gene of mitochondrial DNA (mtDNA) for 36 bears. We identified 17 possible mother-offspring pairs and 8 possible father-offspring pairs. This includes verification of the relationships of 14 mother-offspring pairs identified from field observations. Three additional mother-offspring pairs and all eight father-offspring pairs were determined from genetic and age data. Relatedness coefficients based on numbers of shared alleles between individuals were as expected: approximately 0.50 for parent-offspring and sibling pairs and approximately 0.75 for a father-offspring pair resulting from a father-daughter mating. The level of genetic variation (mean number of alleles per locus = 6.6, mean heterozygosity = 70%) and allele frequencies in grizzly bears in the Prudhoe Bay region are similar to those in other parts of the species' range.**

Genetic issues have become important in the management and conservation of natural populations, particularly in small populations and in species with low reproductive rates (Allendorf and Leary 1986; Ballou and Ralls 1982). Grizzly bears (*Ursus arctos*) have low reproductive rates and population densities and have been the focus of intense management efforts as well as genetic study. Genetic studies of grizzly bears have assessed phylogenetics and population structure (Cronin et al. 1991a; Paetkau et al. 1998a,b; Shields and Kocher 1991; Taberlet and Bouvet 1994; Talbot and Shields 1996a,b; Zhang and Ryder 1993), genetic variation and fitness in small populations (Allendorf et al. 1979; Harris and Allendorf 1989; Paetkau et al. 1998b; Larsen et al. 1983), and practical management applications (i.e., species or sex-identification forensics; Amstrup et al. 1993; Cronin et al. 1991b; Taberlet et al. 1993; Wiig et al. 1998).

Previous genetic studies of grizzly bears in northern Alaska focused on populations in remote, undeveloped areas (Craighead et al. 1995; Talbot and Shields 1996b). A study of reproductive success in a grizzly bear population in the western Brooks Range of northern Alaska indicated that about half the males in this population were effective breeders in a genetically diverse, polygynous, and polyandrous mating system. No male sired more than 11%

of the known offspring in the population, and different males sired cubs in the same litter (Craighead et al. 1995). The grizzly bear population in this region has a slow rate of growth because of a short growing season and harsh climate. Previous research has indicated that male bears do not reproduce until they are 9 years old, and female bears do not reproduce until they are 5 years old, with as many as 4 years between litters (Craighead et al. 1995). However, the population dynamics of grizzly bears may be different in the Prudhoe Bay region northeast of the western Brooks Range (Figure 1) where the grizzly bear population has increased considerably over the last 25 years (Shideler and Hechtel, in press). During this time large oil fields in the Prudhoe Bay region have been developed, and more than 35 bears have used ranges that include the oil field areas. Bears sometimes have access to anthropogenic food in garbage and are not hunted in the oil fields, although they are hunted in the surrounding areas. It is possible that the oil fields attract bears and harbor a subpopulation with relatively high fidelity to their natal areas. The bears in the oil field areas may serve as a reservoir subpopulation that provides immigrants to other areas, or as a sink into which bears from other areas are drawn (Knight et al. 1988). A potential wildlife management problem is that some

From LGL Alaska Research Associates, 4175 Tudor Centre Dr., Anchorage, AK 99508 (Cronin), Alaska Department of Fish and Game, Fairbanks, Alaska (Shideler and Hechtel), University of Alberta, Edmonton, Alberta, Canada (Strobeck), and University of Queensland, Department of Zoology, St. Lucia, Queensland, Australia (Paetkau). This work was supported by funding from BP Exploration (Alaska) Inc. and the Alaska Department of Fish and Game. We are grateful for the support of this project by Drs. C. Herlugson and R. Jacubczak and for the mtDNA lab analysis done by R. Stuart and B. Pierson. We thank two anonymous reviewers who provided useful comments, and S. Talbot for mtDNA data. Address correspondence to M. Cronin at the address above.

© 1999 The American Genetic Association 90:622-628

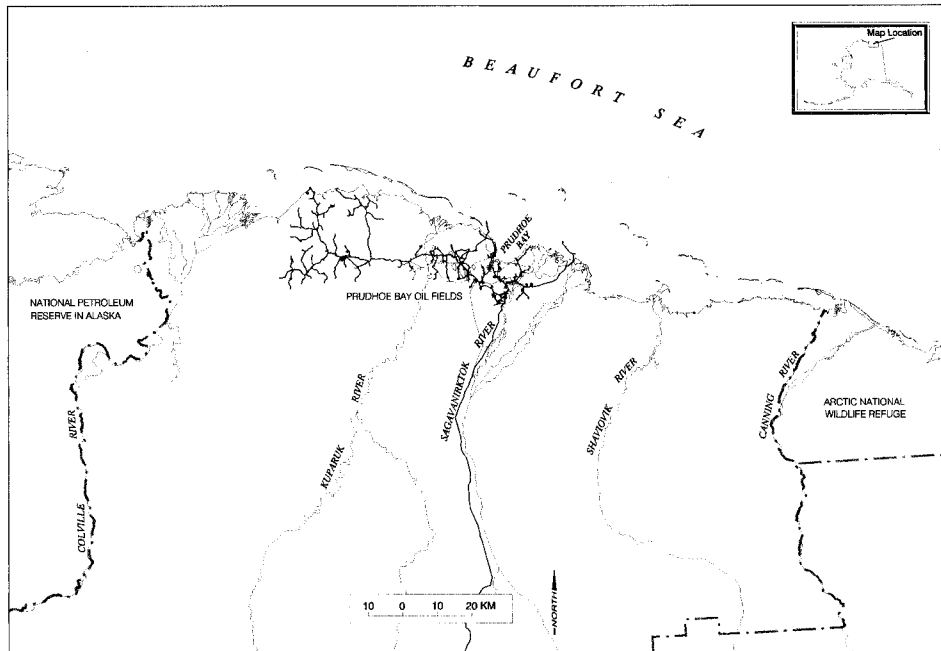

**Figure 1.** Map of the study area in the Prudhoe Bay region of northern Alaska.

bears become conditioned to human foods in the oil fields and are killed when they move to other areas and become a nuisance and/or a hazard to humans (Shideler and Hechtel, in press).

In this article we describe the genetic relationships of the bears in the Prudhoe Bay area, including the large oil fields. Field studies have identified many bears that use habitats in the oil fields, including several mother-offspring and sibling groups (Shideler and Hechtel, in press). Our objective was to quantify the genetic relationships, including parent-offspring and family relationships, of the bears in the Prudhoe Bay region to better understand the population structure of this species in northern Alaska. We focused on two types of genetic markers that have previously been used to assess relatedness in grizzly bears: mitochondrial DNA (mtDNA), which is predominantly maternally inherited (Cronin et al. 1991a; Talbot and Shields 1996a,b), and microsatellite DNA, which is biparentally inherited (Craighead et al. 1995; Paetkau et al. 1998a,b).

## Materials and Methods

Tissue samples were obtained from 37 bears (21 females, 14 males, 2 unknown sex) that were captured for radio collaring (sample numbers 1–31; see appendix) or killed by hunters (sample numbers 100–105; see appendix) in the Prudhoe Bay region from 1985 to 1994 (Figure 1). Blood

was obtained by venipuncture and skin punches were obtained while attaching ear tags to live animals. Muscle tissue was obtained from hunter-killed bears. Mother-offspring and sibling relationships were identified from field observations. The ages of 36 of the 37 bears were determined by counting cementum annuli in excised premolar teeth (Stoneberg and Jonkel 1966) and the age of one bear was unknown.

Genomic DNA was extracted from tissues using QIAamp DNA extraction kits (Qiagen Inc., Chatsworth, CA). The cytochrome *b* gene of mtDNA was amplified from genomic DNA with the polymerase chain reaction (PCR) (Saiki et al. 1988) using the oligonucleotide primers LGL 765, GAAAAACCA(C/T)CGTTGT(T/A)ATTCAACT, and LGL 766, GTTTAATTAGAAT(C/T)T(C/T)AGCTTTGGG. PCR reactions (50  $\mu$ l) contained 5–50 ng DNA in 10 mM Tris-HCl, pH 8.3, 50 mM KCl, 1.5 mM MgCl<sub>2</sub>, 0.2 mM of each dNTP, 1  $\mu$ M of each of the two primers, and 1.25 units of AmpliTaq DNA polymerase (Perkin-Elmer, Norwalk, CT). Reactions were heated to 95°C for 5 min followed by 32 cycles of amplification. Each cycle consisted of 45 s at 95°C, 40 s at 50°C, and 2.5 min at 70°C. Amplification products were sequenced with the 765 primer on an autosequencer (ABI model 373A; Automated Biosystems Inc., Foster City, CA) using dye-labeled terminators (Carr and Marshall 1991). The DNA sequences were aligned with the SeqEd computer program (Automated Biosystems Inc.)

and nucleotide substitutions were used to identify mtDNA haplotypes for each bear. MtDNA haplotypes were compared among bears that were known or suspected to be related, and with other populations (Talbot and Shields 1996b).

Fourteen microsatellite loci were analyzed, including eight (Table 1) which have previously been studied in Alaska grizzly bears (Craighead et al. 1995; Paetkau et al. 1997, 1998a,b). The PCR primers and reaction conditions are described by Paetkau et al. (1998a).

We assessed measures of genetic variation in the Prudhoe Bay bears, including the number of alleles (*A*) and unbiased expected heterozygosity (*H*; Nei and Roychoudhury 1974) for the microsatellite loci. We also used goodness-of-fit chi-square tests (with pooling of rare alleles) to test for Hardy–Weinberg equilibrium for the microsatellite loci using the BIOSYS computer program (Swofford and Selander 1981). We calculated the unbiased probabilities of identity (Paetkau et al. 1998b), probabilities of paternal exclusion (i.e., the probability that an unrelated male can be excluded as a potential father if the mother's genotype is known; Chakravarti and Li 1983), and probabilities of parent-offspring exclusion (i.e., the probability that an unrelated individual can be excluded as a potential parent or offspring if there is no genetic information on relatives, Paetkau et al. 1998a) using the microsatellite allele frequencies. To quantify relationships of all the bears sampled in the Prudhoe Bay population we calculated pairwise relatedness coefficients ( $r_{xy}$ ; Blouin et al. 1996; Pamilo 1989; Queller and Goodnight 1989) using the Kinship 1.1.2 computer program (Goodnight KF, Rice University, Houston, TX). This coefficient was calculated from the number of microsatellite alleles shared by two bears, weighted by the allele frequencies in the population. This is superior to a simple proportion of shared alleles because it weighs shared rare alleles more than shared common alleles.

We compared the microsatellite genotypes among potential parents and offspring to assess family relationships. We assumed a minimum breeding age of 5 years for males (Craighead et al. 1995), and therefore considered each pair of bears which differed by  $\geq 6$  years of age as potential parent-offspring pairs. For example, if a bear born in 1984 conceived an offspring as a 5-year-old in 1989, the offspring's birth year would be 1990, or 6 years from the birth year of the parent.

**Table 1. Microsatellite allele frequencies, number of alleles (*A*), and heterozygosity (*H*) for grizzly bears from the Prudhoe Bay region, Alaska**

| Locus                   | Allele      | Fre-<br>quency | Locus                   | Allele | Fre-<br>quency |
|-------------------------|-------------|----------------|-------------------------|--------|----------------|
| <i>G10B<sup>a</sup></i> | 140         | 0.2500         | <i>G10P<sup>a</sup></i> | 149    | 0.0139         |
|                         | 148         | 0.0694         |                         | 151    | 0.4028         |
|                         | 150         | 0.0139         |                         | 153    | 0.2222         |
|                         | 152         | 0.0833         |                         | 155    | 0.1250         |
|                         | 158         | 0.0694         |                         | 157    | 0.1250         |
|                         | 160         | 0.2778         |                         | 159    | 0.0694         |
|                         | 164         | 0.2361         |                         | 161    | 0.0417         |
|                         | A/H         | 7/80%          |                         | A/H    | 7/76%          |
| <i>G10C<sup>a</sup></i> | 103         | 0.3194         | <i>G10X<sup>a</sup></i> | 131    | 0.1667         |
|                         | 105         | 0.3472         |                         | 133    | 0.0278         |
|                         | 107         | 0.1667         |                         | 135    | 0.0694         |
|                         | 109         | 0.0278         |                         | 137    | 0.5278         |
|                         | 111         | 0.1389         |                         | 141    | 0.2083         |
|                         | A/H         | 5/74%          |                         | A/H    | 5/65%          |
| <i>G10L<sup>a</sup></i> | 171         | 0.0833         | <i>G1A<sup>a</sup></i>  | 180    | 0.0417         |
|                         | 151         | 0.0139         |                         | 184    | 0.2222         |
|                         | 155         | 0.4861         |                         | 186    | 0.0139         |
|                         | 157         | 0.3194         |                         | 190    | 0.0139         |
|                         | 159         | 0.0278         |                         | 192    | 0.1944         |
|                         | 163         | 0.0694         |                         | 194    | 0.4028         |
|                         | A/H         | 6/66%          |                         | 196    | 0.0278         |
|                         |             |                |                         | 198    | 0.0694         |
|                         |             |                |                         | 200    | 0.0139         |
|                         |             |                |                         | A/H    | 9/75%          |
| <i>G10M<sup>a</sup></i> | 206         | 0.1528         | <i>G1D<sup>a</sup></i>  | 172    | 0.2778         |
|                         | 208         | 0.2778         |                         | 174    | 0.0556         |
|                         | 210         | 0.0972         |                         | 176    | 0.0278         |
|                         | 212         | 0.0694         |                         | 178    | 0.2500         |
|                         | 214         | 0.3611         |                         | 180    | 0.0278         |
|                         | 218         | 0.4170         |                         | 181    | 0.2083         |
|                         | A/H         | 6/76%          |                         | 182    | 0.0139         |
|                         |             |                |                         | 184    | 0.0972         |
|                         |             |                |                         | 186    | 0.0417         |
|                         |             |                |                         | A/H    | 9/81%          |
| <i>CXX20</i>            | 123         | 0.0139         | <i>G10O</i>             | 182    | 0.2639         |
|                         | 127         | 0.0526         |                         | 192    | 0.0556         |
|                         | 129         | 0.4444         |                         | 198    | 0.5556         |
|                         | 133         | 0.0278         |                         | 200    | 0.0139         |
|                         | 135         | 0.0417         |                         | 204    | 0.1111         |
|                         | 139         | 0.0833         |                         | A/H    | 5/61%          |
|                         | 141         | 0.0417         |                         |        |                |
|                         | 143         | 0.2917         |                         |        |                |
|                         | A/H         | 8/71%          |                         |        |                |
| <i>G10H</i>             | 221         | 0.5972         | <i>MU50</i>             | 110    | 0.1111         |
|                         | 229         | 0.0278         |                         | 122    | 0.0556         |
|                         | 231         | 0.1528         |                         | 126    | 0.0139         |
|                         | 233         | 0.1111         |                         | 128    | 0.1389         |
|                         | 237         | 0.0139         |                         | 130    | 0.3056         |
|                         | 252         | 0.0139         |                         | 132    | 0.0139         |
|                         | 254         | 0.0556         |                         | 134    | 0.0556         |
|                         | 257         | 0.0278         |                         | 138    | 0.3056         |
|                         | A/H         | 8/61%          |                         | A/H    | 8/79%          |
|                         | <i>G10J</i> | 78             |                         | 0.0278 | <i>MU59</i>    |
| 80                      |             | 0.4861         | 227                     | 0.7083 |                |
| 86                      |             | 0.1667         | 229                     | 0.0833 |                |
| 90                      |             | 0.0694         | 239                     | 0.0972 |                |
| 96                      |             | 0.2500         | 247                     | 0.0972 |                |
| A/H                     |             | 5/68%          | A/H                     | 5/48%  |                |

<sup>a</sup> Loci analyzed for other populations by Paetkau et al. (1998b) and Craighead et al. (1995).

**Table 2. MtDNA cytochrome *b* nucleotide substitutions and haplotypes**

| Nucleotide position | Nucleotide position |       |       |       | Haplotype | Number of Prudhoe Bay bears |
|---------------------|---------------------|-------|-------|-------|-----------|-----------------------------|
|                     | 14933               | 14975 | 15075 | 15191 |           |                             |
| Nucleotides         | C                   | A     | T     | T     | GB10*     | 3                           |
|                     | T                   | G     | T     | C     | GB14*     | 7                           |
|                     | T                   | G     | C     | C     | GB19*     | 24                          |

Nucleotide positions correspond to those reported by Talbot and Shields (1996b).

The youngest age at which females breed successfully in the western Brooks Range appears to be 5 years old (Craighead et al. 1995). However, field observations in the Prudhoe Bay region suggested that a 5-year-old female had an offspring (conceived when the female was 4). We therefore included all females  $\geq 5$  years of age in assessing potential female-offspring pairs. If a pair of bears shared at least one allele at each of the 14 microsatellite loci they were not excluded as a parent-offspring pair. Sharing one allele at each locus by two individuals does not verify a parent-offspring relationship, but indicates it is possible. For the potential female parents, we also compared mtDNA genotypes with those of potential offspring. We combined the microsatellite, mtDNA, and field data to construct pedigrees. We use the term "related bears" to include parent-offspring and sibling pairs and the term "unrelated bears" to include non-parent-offspring and non-sibling pairs.

## Results

We obtained 450 nucleotides of cytochrome *b* mtDNA sequence for 34 of the 37 bears sampled. DNA from three of the bears did not amplify in the PCR reactions and was not sequenced (bears 5, 7, 8; see appendix). Our sequences correspond to nucleotide positions 14796–15246 of the 1140 cytochrome *b* nucleotides reported by Talbot and Shields (1996b; GenBank accession numbers U18870–U18899). We detected nucleotide substitutions at four positions that occur in three haplotypes (Table 2). These three haplotypes correspond to haplotypes GB10, GB14, and GB19 which were observed in other northern Alaska grizzly bear populations by Talbot and Shields (1996b). Because our sequences include only 450 nucleotides, we cannot be certain our haplotypes have the same sequences as those of Talbot and Shields for all 1,140 nucleotides of the cytochrome *b* gene. We therefore designated our haplotypes as GB10\*, GB14\*, and GB19\*.

We obtained genotypes at 14 microsat-

ellite loci for 36 of the 37 bears sampled (see appendix). DNA from one bear (no. 8) did not amplify in the PCR reactions. With the exception of one locus (*G1D*), the microsatellite alleles differed in size by two or more nucleotides indicating variable numbers of dinucleotide repeats. Locus *G1D* had alleles that varied by single nucleotides (i.e., 180, 181, and 182 nucleotides; Table 1) as observed by Craighead et al. (1995) and verified with DNA sequencing (Paetkau et al. 1998a). There is abundant variation at the 14 microsatellite loci analyzed, with 5–9 alleles per locus (mean  $A = 6.6$ ), and 48–81% heterozygosity across loci (mean  $H = 70.2\%$ ; Table 1).

Goodness-of-fit chi-square tests showed that genotypes of 13 of the microsatellite loci in the Prudhoe Bay grizzly bear population did not differ significantly from expected Hardy–Weinberg proportions ( $p > .096$ ). One locus, *G10H*, was not in Hardy–Weinberg equilibrium, and had significantly more heterozygotes than expected ( $p = .049$ ). However, a Bonferroni correction indicates the appropriate level of significance for 14 loci is  $p = .0036$  (i.e., 0.05/14), suggesting the deviation at the *G10H* locus may be due to chance. For eight of these loci (Table 1) Craighead et al. (1995) also found no evidence of deviation from Hardy–Weinberg expectation in the western Brooks Range grizzly bear population.

No bears in our sample shared the same genotypes at all 14 loci, and the probability of identity of the Prudhoe Bay bears is high,  $4 \times 10^{-13}$ . This translates to a probability of two unrelated bears sharing the same 14-locus genotype of greater than 1 in 2 trillion. The probability of paternal exclusion is .9999 and the probability of parent/offspring exclusion is .9938. These microsatellite loci are clearly useful for individual identity and pedigree analysis.

## Mother-Offspring Relationships

The genetic and field data identified probable family relationships of several bears in the Prudhoe Bay region. Related bears included six multiple litters (five sets of twins and one set of triplets) and five single offspring (Table 3, Figure 2). There are

**Table 3. Parent-offspring relationships of grizzly bears determined from 14 microsatellite loci and mtDNA**

| Sample no.                 | Breed-<br>ing<br>age | MtDNA<br>haplotype           | Sample no. | Birth<br>year | mtDNA<br>haplotype | Relationship<br>from field<br>observations | $r_{xy}$           |
|----------------------------|----------------------|------------------------------|------------|---------------|--------------------|--------------------------------------------|--------------------|
| <b>Mother</b>              |                      | <b>Offspring</b>             |            |               |                    |                                            |                    |
| 1                          | 4                    | GB19*                        | 23         | 1992          | GB19*              | Suspected                                  | 0.5357             |
| 2                          | 10                   | GB19*                        | 1          | 1987          | GB19*              | Suspected                                  | 0.4612             |
| 2                          | 10                   | GB19*                        | 6          | 1987          | GB19*              | Suspected                                  | 0.3884             |
| 2                          | 13                   | GB19*                        | 9          | 1990          | GB19*              | Known                                      | 0.5568             |
| 2                          | 16                   | GB19*                        | 24         | 1993          | GB19*              | Suspected                                  | 0.4642             |
| 2                          | 16                   | GB19*                        | 25         | 1993          | GB19*              | Suspected                                  | 0.4170             |
| 2                          | 16                   | GB19*                        | 27         | 1993          | GB19*              | Suspected                                  | 0.4925             |
| 4                          | 5                    | GB19*                        | 11         | 1992          | GB19*              | Known                                      | 0.6352             |
| 4                          | 5                    | GB19*                        | 12         | 1992          | GB19*              | Known                                      | 0.6120             |
| 10                         | 7                    | GB19*                        | 15         | 1992          | GB19*              | Known                                      | 0.3615             |
| 10                         | 7                    | GB19*                        | 16         | 1992          | GB19*              | Known                                      | 0.3938             |
| 19                         | 12                   | GB14*                        | 17         | 1993          | GB14*              | Suspected                                  | 0.4202             |
| 19                         | 12                   | GB14*                        | 18         | 1993          | GB14*              | Suspected                                  | 0.5241             |
| 19                         | 18                   | GB14*                        | 7          | 1989          | Not Done           | Unknown                                    | 0.5661             |
| 21                         | 9                    | GB19*                        | 4          | 1986          | GB19*              | Unknown                                    | 0.4459             |
| 21                         | 7                    | GB19*                        | 10         | 1984          | GB19*              | Unknown                                    | 0.4989             |
| 21                         | 16                   | GB19*                        | 30         | 1993          | GB19*              | Known                                      | 0.6379             |
|                            |                      |                              |            |               |                    |                                            | $\bar{x} = 0.4948$ |
|                            |                      |                              |            |               |                    |                                            | SD = 0.0869        |
| <b>Father</b>              |                      | <b>Offspring</b>             |            |               |                    |                                            |                    |
| 14                         | 10                   | GB14*                        | 15         | 1992          | GB19*              | Unknown                                    | 0.4281             |
| 14                         | 10                   | GB14*                        | 16         | 1992          | GB19*              | Unknown                                    | 0.5065             |
| 20                         | 12                   | GB19*                        | 4          | 1986          | GB19*              | Unknown                                    | 0.4721             |
| 20                         | 13                   | GB19*                        | 1          | 1987          | GB19*              | Unknown                                    | 0.5750             |
| 20                         | 13                   | GB19*                        | 6          | 1987          | GB19*              | Unknown                                    | 0.6128             |
| 20                         | 18                   | GB19*                        | 11         | 1992          | GB19*              | Unknown                                    | 0.7291             |
| 20                         | 18                   | GB19*                        | 12         | 1992          | GB19*              | Unknown                                    | 0.7458             |
| 31                         | 8                    | GB10*                        | 30         | 1993          | GB19*              | Unknown                                    | 0.5085             |
|                            |                      |                              |            |               |                    |                                            | $\bar{x} = 0.5722$ |
|                            |                      |                              |            |               |                    |                                            | SD = 0.1168        |
| <b>Hypothetical father</b> |                      | <b>Offspring<sup>a</sup></b> |            |               |                    |                                            |                    |
| Hypothetical               | n/a                  | n/a                          | 7          | 1989          | Not Done           | Unknown                                    | 0.2277             |
| Hypothetical               | n/a                  | n/a                          | 17         | 1993          | GB14*              | Unknown                                    | 0.3456             |
| Hypothetical               | n/a                  | n/a                          | 18         | 1993          | GB14*              | Unknown                                    | 0.3148             |
| Hypothetical               | n/a                  | n/a                          | 23         | 1992          | GB19*              | Unknown                                    | 0.1298             |
| Hypothetical               | n/a                  | n/a                          | 24         | 1993          | GB19*              | Unknown                                    | 0.4887             |
| Hypothetical               | n/a                  | n/a                          | 25         | 1993          | GB19*              | Unknown                                    | 0.4984             |
| Hypothetical               | n/a                  | n/a                          | 27         | 1993          | GB19*              | Unknown                                    | 0.4928             |

The parents and offspring listed share at least one allele at each of the 14 loci. Additional pairs not excluded as parent-offspring with genetic data but which field data indicate are not parent-offspring: 2-3, 3-104, 6-23, 1-100, 6-100, 23-100, 27-100.

<sup>a</sup> The hypothetical father was identified from the genotypes for the triplets (bears 24, 25, and 27) and their mother (bear 2). The  $r_{xy}$  values were calculated using the inferred genotypes for the hypothetical father (see appendix).

two mtDNA haplotypes in the related bears, including two maternal lineages initiated by bears 2 and 21 (with mtDNA haplotype GB19\*), and one maternal lineage initiated by bear 19 (with mtDNA haplotype GB14\*). There are 19 bears with mtDNA haplotype GB19\* and 4 bears with mtDNA haplotype GB14\* in the pedigrees (Table 3, Figure 2). Three bears have the mtDNA GB10\* haplotype (Table 2, appendix), but they are not in the maternal lineages of related bears. One of these (bear 31) is a father in the pedigree, but his (maternally inherited) mtDNA would not be transmitted to offspring.

The assessments of parentage included 206 pairwise comparisons of 10 females with potential offspring. We identified 17 possible mother-offspring pairs that shared at least one allele at each micro-

satellite locus and the same mtDNA haplotype (Table 3). This included 6 different females as possible mothers of 17 different offspring (Figure 2). Bear 8, for which there was no genetic data, was known to be an offspring of bear 2 from field observations, and we included him in Figure 2. The  $r_{xy}$  values for the mother-offspring pairs were close to 0.5 as expected (mean = 0.4948; Table 3). An additional pair (bears 2 and 3) shared at least one allele per locus and was also identified as a potential mother-offspring pair. However, bear 3 was born in 1988 and bear 2 had twins (bears 1 and 6) in 1987 and probably would not have bred that year. In addition, bears 3 and 5 are siblings (Table 4) and bear 5 shared alleles with bear 2 at only 13 of the 14 loci. Therefore bear 5 is excluded as an offspring of bear 2, and

bear 5's sibling, bear 3, is also excluded as an offspring of bear 2 by association. Another bear (bear 23) had two potential mothers (bear 1 or bear 6) identified with genetic data. Field observations suggested that bear 1 was the mother of bear 23 and a sibling of bear 6 (i.e., bear 6 is the aunt of bear 23; Figure 2). Bear 1 was only 4 years old in the conception year (and 5 years old in the birth year) of bear 23, suggesting that bear 1 bred at 4 years of age. The other mothers ranged from 5 to 18 years old when bred (Table 3). There were 6 of 10 (0.60) adult females  $\geq 4$  years of age who had offspring in our sample.

The mother-offspring pairs identified with genetic data were consistent with field observations. Of 14 known or suspected mother-offspring pairs identified from field observations, all were confirmed with the microsatellite and mtDNA genotypes (Table 3, Figure 2). As stated previously, the genetic data suggested two potential mothers for bear 23, but field observations allowed identification of the mother (bear 1). This indicates that bears other than parent-offspring pairs (in this case an aunt-niece pair, bears 6 and 23) may share an allele at each locus. Another example is the case of bears 2 and 3 described above. These examples indicate that caution should be exercised when inferring parent-offspring relationships from a limited number of genetic loci without corroborating field and age data. Accordingly, three possible mother-offspring pairs that were identified from genetic data alone can be considered probable (though not verified) parent-offspring pairs: bear 21 as the mother of bears 4 and 10, and bear 19 as the mother of bear 7 (Figure 2; Table 3). In these cases, the probability of identifying a parent-offspring pair without knowledge of the other parent (and without corroborating field evidence) is lower than in cases when one parent is known (i.e., identifying a father when the mother is known). We therefore identified these relationships with dashed lines in the pedigree (Figure 2).

#### Father-Offspring Relationships

There were no field observations of mating pairs and thus no known or suspected fathers. Our genetic analysis included 100 pairwise comparisons of five males with potential offspring. We identified eight potential father-offspring pairs that shared at least one allele at each microsatellite locus (Table 3, Figure 2). There were three males that were potential fathers: bear 20 who sired two sets of twins (bears 1 and

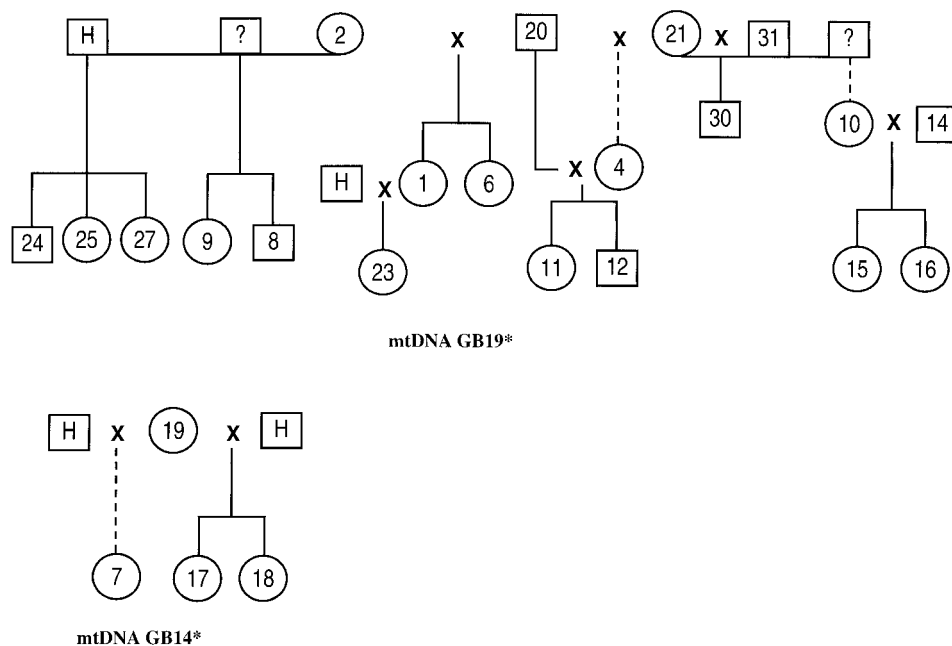

**Figure 2.** Pedigrees of related grizzly bears from the Prudhoe Bay region of northern Alaska. A hypothetical male (H) represents a possible unsampled father whose genotypes were inferred from the microsatellite data for sampled bears. The bears had the mtDNA haplotypes indicated, except for bear 31 that had mtDNA haplotype GB10\* (see text). The dashed lines are for relationships in which the mother is not known or is suspected from field observations and the probability of parentage identity is lower than in the other cases.

6, and bears 11 and 12) and one single offspring (bear 4); bear 14 who sired one set of twins (bears 15 and 16); and bear 31 who sired a single offspring (bear 30). Bear 4 was the only one of these offspring for which the mother was not known or suspected from field observations, so the probability of this parental identity is lower and indicated by a dashed line in the pedigree (Figure 2). The males identified as fathers were between 8 and 18 years old at breeding. It appears that bear 31 bred at 8 years of age to sire bear 30 (Table 3). We found no evidence of littermates with different fathers (i.e., multiple paternity). There were 3 of 5 (0.60) adult

males  $\geq 8$  years of age who sired offspring in our sample.

The  $r_{xy}$  values for the father-offspring pairs were close to 0.5 as expected (0.5722; Table 3). Note that bear 20 mated with his daughter (bear 4) to sire twins, bears 11 and 12 (Table 3; Figure 2). The  $r_{xy}$  values of bears 20 and 4 (0.47), bears 20 and 11 (0.73), and bears 20 and 12 (0.75) are consistent with values expected for these relationships.

In addition to the possible father-offspring pairs in Table 3 and Figure 2, bear 3 was not excluded as the father of bear 104 with the genetic data. However, bear 3 was only 3 years old when bear 104 was

conceived and bear 3 was probably too young to be the father of bear 104. The genetic data also indicated another male (bear 100) was not excluded as the parent or offspring of four bears (bears 1, 6, 23, and 27). However, bear 100's birth year differed by  $\leq 3$  years from the birth years of these four bears, so they are not likely parent-offspring pairs. All four of these bears are offspring or grandoffspring of female bear 2 (Figure 2), but bear 100 was excluded as an offspring of bear 2 at one locus (*G10M*; see appendix). Therefore bear 100 is not a parent, offspring, or sibling of these four bears, but he is apparently closely related to their lineage.

The genotypes of the triplets (bears 24, 25, and 27) and their mother (bear 2) allow identification of a "hypothetical male" as the father (Craighead et al. 1995). By identifying the maternal allele in each of the triplets, the alleles contributed by the father can be inferred. Two alleles can be identified for the hypothetical male at six loci, and one allele at eight loci (see appendix). Considering the genotypes at the six loci for which both alleles were identified, this hypothetical male could have sired bears 7, 17, 18, and 23 in addition to the triplets (Table 3; Figure 2). We cannot verify if this hypothetical male represents one unsampled father of these bears, but it is possible.

Fathers and offspring did not share mtDNA haplotypes in three cases. Bear 14 (haplotype GB14\*) sired bears 15 and 16 (haplotype GB19\*), and bear 31 (haplotype GB10\*) sired bear 30 (haplotype GB19\*). This result is not unexpected because mtDNA is predominantly maternally inherited. In the pedigrees, fathers of seven bears in the mtDNA GB19\* lineage and three bears in the mtDNA GB14\* lineage are unidentified (Figure 2).

**Table 4.** MtDNA haplotypes, number of microsatellite loci with at least one shared allele, known parents, and  $r_{xy}$  coefficients for grizzly bear siblings identified in the field

| Sibling 1 | mtDNA haplotype | Sibling 2 | mtDNA haplotype | Number of microsatellite loci with shared allele | Known shared parents <sup>a</sup> | $r_{xy}$           |
|-----------|-----------------|-----------|-----------------|--------------------------------------------------|-----------------------------------|--------------------|
| 3         | GB19*           | 5         | Not Done        | 14                                               | Unknown                           | 0.6505             |
| 24        | GB19*           | 25        | GB19*           | 11                                               | Mother                            | 0.5201             |
| 24        | GB19*           | 27        | GB19*           | 12                                               | Mother                            | 0.4912             |
| 25        | GB19*           | 27        | GB19*           | 13                                               | Mother                            | 0.4488             |
| 1         | GB19*           | 6         | GB19*           | 14                                               | Mother/Father                     | 0.7238             |
| 11        | GB19*           | 12        | GB19*           | 13                                               | Mother/Father                     | 0.6327             |
| 15        | GB19*           | 16        | GB19*           | 12                                               | Mother/Father                     | 0.3668             |
| 17        | GB14*           | 18        | GB14*           | 13                                               | Mother                            | 0.5349             |
|           |                 |           |                 |                                                  |                                   | $\bar{x} = 0.5461$ |
|           |                 |           |                 |                                                  |                                   | SD = 0.1167        |

<sup>a</sup> Shared parents identified from field and/or genetic data.

### Sibling and General Relationships

Field observations identified siblings as well as parent-offspring pairs. Siblings may not necessarily share alleles at all loci, as each sibling may receive different alleles for a locus from the same parent. However, siblings share as many alleles, on average, as parent-offspring pairs and inherit the same mtDNA haplotype from their mother. Our genetic data support the sibling relationships determined in the field, as the siblings share the same mtDNA haplotypes and share at least one allele for most or all (11–14 loci) of the microsatellite loci (Table 4). The  $r_{xy}$  values for sibling pairs were close to 0.5 (0.5461; Table 4) as expected. We can infer other relationships

from the genetic data (Figure 2) including half siblings (e.g., bears 1 and 11) and grandparent-grandson/granddaughter pairs (e.g., bears 20 and 23).

The relatedness coefficients between related bears (i.e., parent-offspring or sibling pairs) were high (mean  $r_{xy} = 0.5262$ ) compared to unrelated bears (mean  $r_{xy} = -0.0376$ ). Among related bears  $r_{xy}$  values were similar for mother-offspring pairs (mean  $r_{xy} = 0.4948$ ), father-offspring pairs (mean  $r_{xy} = 0.5722$ ), and siblings (mean  $r_{xy} = 0.5461$ ) (Tables 3 and 4).

## Discussion

Our study shows that both field and genetic data should be considered when inferring genetic relationships in natural populations (Pemberton et al. 1992). We identified several bears that were not excluded as parent-offspring pairs with genetic data, but which field and age data indicated were not parent-offspring.

The combination of field and genetic data indicates there are many related individuals and family groups of bears in the Prudhoe Bay region. Although grizzly bears (particularly males) have large home ranges and move long distances (Craighead et al. 1995; Shideler and Hechtel, in press), some bears had fidelity to the Prudhoe Bay region and produced offspring there over several years. Offspring were produced in the region by female bear 2 from 1987 to 1993, by female bear 21 from 1984 to 1993, and by male bear 20 from 1986 to 1992 (Table 3).

Our results are consistent with maternal and biparental modes of inheritance of mtDNA and microsatellites, respectively. All mother-offspring and sibling pairs shared mtDNA genotypes, but three father-offspring pairs did not share mtDNA genotypes. All mother-offspring pairs identified from field data shared at least one microsatellite allele per locus and  $r_{xy}$  values were as expected: parent-offspring

and sibling pairs had  $r_{xy}$  values about 0.5; unrelated bears had  $r_{xy}$  values about 0; and the father-offspring pairs resulting from a father-daughter mating had  $r_{xy}$  values about 0.75. Blouin et al. (1996) obtained similar results for mice (*Mus musculus*), with  $r_{xy}$  values about 0.5 among parent-offspring and siblings and about 0 among unrelated mice.

The genetic patterns of the grizzly bears in the Prudhoe Bay region and the western Brooks Range were similar, although there were some differences. Although Craighead et al. (1995) found evidence of multiple paternity in litters (with a larger sample size) in the western Brooks Range, we found no evidence of this in our study. In addition, it appears that males may reproduce at 8 years old and females at 4 years old in the Prudhoe Bay region. Craighead et al. (1995) reported minimum breeding ages of males as 9 years and females as 5 years in the western Brooks Range.

The extensive genetic and field data in

**Appendix. Birth year, sex, and genotypes for 14 microsatellite DNA loci and mtDNA for 36 grizzly bears and one hypothetical male bear from the Prudhoe Bay region of Alaska**

| Bear number  | Birth year/sex  | Microsatellite locus |         |         |         |         |         |         |         |         |       |         |         |         |         | mtDNA |
|--------------|-----------------|----------------------|---------|---------|---------|---------|---------|---------|---------|---------|-------|---------|---------|---------|---------|-------|
|              |                 | G10D                 | G10A    | G10B    | G10L    | G10M    | G10P    | G10X    | G10H    | G10C    | G10J  | G10O    | CX20    | MU50    | MU59    |       |
| 1            | 1987/female     | 178/184              | 192/194 | 164/164 | 157/171 | 208/214 | 151/151 | 131/137 | 221/231 | 103/107 | 80/80 | 182/198 | 129/143 | 138/138 | 227/229 | GB19* |
| 2            | 1976/female     | 172/178              | 184/194 | 148/164 | 155/157 | 214/214 | 151/151 | 137/137 | 221/233 | 103/105 | 80/96 | 182/198 | 129/129 | 138/138 | 227/229 | GB19* |
| 3            | 1988/male       | 172/186              | 194/194 | 160/164 | 155/157 | 214/214 | 151/157 | 131/137 | 221/231 | 105/107 | 80/96 | 198/198 | 129/141 | 122/138 | 227/229 | GB19* |
| 4            | 1986/female     | 172/181              | 184/192 | 140/152 | 155/157 | 206/208 | 151/151 | 131/141 | 221/221 | 107/111 | 80/90 | 198/198 | 129/143 | 110/130 | 227/227 | GB19* |
| 5            | 1988/male       | 172/186              | 194/194 | 160/160 | 157/157 | 212/214 | 151/157 | 137/137 | 221/231 | 105/105 | 80/96 | 198/198 | 129/129 | 128/138 | 227/229 | ND    |
| 6            | 1987/female     | 178/181              | 184/192 | 164/164 | 157/171 | 208/214 | 151/151 | 131/137 | 221/233 | 103/107 | 80/80 | 182/198 | 129/143 | 130/138 | 227/227 | GB19* |
| 7            | 1989/female     | 172/181              | 184/194 | 140/164 | 157/163 | 208/214 | 153/155 | 131/141 | 231/254 | 103/103 | 80/86 | 182/198 | 129/139 | 128/130 | 227/239 | ND    |
| 8            | 1990/male       | ND <sup>a</sup>      | ND      | ND      | ND      | ND      | ND      | ND      | ND      | ND      | ND    | ND      | ND      | ND      | ND      | ND    |
| 9            | 1990/female     | 172/181              | 180/184 | 148/160 | 155/155 | 214/214 | 151/155 | 137/137 | 221/233 | 103/105 | 80/80 | 198/198 | 129/129 | 122/138 | 227/227 | GB19* |
| 10           | 1984/female     | 176/178              | 198/200 | 152/158 | 155/155 | 210/212 | 151/153 | 137/141 | 221/221 | 105/107 | 86/90 | 182/198 | 129/143 | 130/138 | 239/247 | GB19* |
| 11           | 1992/female     | 172/184              | 184/192 | 140/152 | 157/171 | 208/208 | 151/151 | 131/137 | 221/221 | 107/111 | 80/80 | 198/204 | 129/143 | 110/138 | 227/227 | GB19* |
| 12           | 1992/male       | 181/184              | 184/194 | 140/152 | 155/157 | 208/208 | 151/151 | 137/141 | 221/221 | 107/111 | 80/80 | 198/204 | 143/143 | 130/130 | 227/227 | GB19* |
| 13           | 1979/male       | 178/181              | 184/194 | 158/164 | 151/155 | 214/214 | 155/157 | 135/137 | 221/233 | 105/105 | 80/96 | 182/192 | 129/143 | 130/130 | 227/239 | GB19* |
| 14           | 1981/male       | 172/178              | 194/196 | 140/160 | 155/155 | 214/218 | 159/161 | 137/137 | 221/233 | 103/111 | 86/96 | 182/204 | 141/143 | 128/134 | 227/227 | GB14* |
| 15           | 1992/female     | 172/176              | 196/198 | 140/152 | 155/155 | 210/218 | 153/159 | 137/141 | 221/233 | 105/111 | 90/96 | 182/204 | 143/143 | 128/138 | 227/239 | GB19* |
| 16           | 1992/female     | 178/178              | 194/198 | 140/158 | 155/155 | 210/214 | 151/159 | 137/137 | 221/221 | 103/105 | 86/96 | 182/204 | 143/143 | 130/134 | 227/239 | GB19* |
| 17           | 1993/female     | 172/174              | 194/194 | 160/164 | 155/163 | 206/214 | 153/155 | 131/137 | 221/254 | 103/103 | 80/86 | 198/198 | 139/139 | 110/128 | 227/227 | GB14* |
| 18           | 1993/female     | 172/174              | 184/194 | 160/160 | 155/163 | 206/214 | 155/155 | 137/141 | 231/254 | 103/105 | 80/86 | 198/198 | 129/139 | 130/130 | 227/227 | GB19* |
| 19           | 1980/female     | 172/181              | 184/194 | 140/160 | 163/163 | 214/214 | 153/155 | 137/141 | 221/254 | 103/105 | 80/86 | 182/198 | 129/139 | 110/130 | 227/239 | GB14* |
| 20           | 1973/male       | 181/184              | 192/194 | 140/164 | 157/171 | 208/208 | 151/151 | 131/137 | 221/221 | 107/107 | 80/80 | 198/204 | 143/143 | 130/138 | 227/227 | GB19* |
| 21           | 1976/female     | 172/178              | 184/198 | 152/160 | 155/155 | 206/212 | 151/153 | 141/141 | 221/221 | 105/111 | 86/90 | 198/198 | 129/129 | 110/130 | 227/247 | GB19* |
| 22           | 1990/male       | 178/184              | 192/194 | 140/140 | 155/155 | 208/208 | 155/157 | 133/137 | 221/229 | 103/105 | 80/80 | 182/200 | 129/143 | 132/138 | 227/227 | GB14* |
| 23           | 1992/female     | 181/184              | 192/192 | 160/164 | 157/171 | 208/214 | 151/153 | 137/137 | 221/221 | 103/103 | 80/80 | 182/198 | 129/143 | 130/138 | 227/227 | GB19* |
| 24           | 1993/male       | 172/174              | 184/192 | 148/164 | 157/157 | 206/214 | 151/153 | 131/137 | 221/233 | 103/103 | 96/96 | 198/198 | 129/129 | 128/138 | 227/227 | GB19* |
| 25           | 1993/female     | 178/181              | 194/194 | 148/160 | 155/157 | 206/214 | 151/153 | 131/137 | 221/233 | 105/111 | 96/96 | 198/198 | 129/129 | 128/138 | 227/227 | GB19* |
| 26           | 1986/male       | 172/174              | 192/194 | 140/158 | 155/155 | 210/214 | 151/153 | 137/141 | 221/231 | 105/105 | 80/96 | 182/204 | 127/127 | 130/134 | 223/247 | GB19* |
| 27           | 1993/female     | 178/181              | 194/194 | 148/164 | 157/157 | 206/214 | 151/153 | 137/137 | 221/231 | 103/103 | 96/96 | 182/198 | 129/139 | 130/138 | 227/229 | GB19* |
| 28           | 1982/female     | 180/182              | 190/194 | 140/158 | 157/159 | 208/214 | 149/151 | 137/141 | 221/231 | 105/105 | 80/80 | 182/198 | 135/135 | 110/130 | 227/227 | GB10* |
| 29           | 1974/female     | 178/181              | 184/194 | 150/160 | 155/157 | 208/210 | 153/157 | 135/135 | 221/252 | 107/111 | 90/96 | 192/192 | 123/143 | 128/130 | 227/227 | GB14* |
| 30           | 1993/male       | 172/178              | 184/198 | 160/160 | 155/155 | 208/212 | 153/153 | 137/141 | 221/221 | 105/109 | 86/86 | 198/198 | 129/133 | 110/122 | 247/247 | GB19* |
| 31           | 1984/male       | 172/180              | 180/184 | 140/160 | 155/155 | 208/210 | 151/153 | 137/137 | 221/229 | 109/111 | 80/86 | 182/198 | 129/133 | 110/122 | 227/247 | GB10* |
| 100          | 1990/male       | 178/181              | 192/194 | 164/164 | 155/157 | 206/208 | 151/153 | 131/137 | 221/221 | 103/103 | 80/96 | 182/198 | 129/129 | 128/138 | 227/227 | GB19* |
| 101          | Unknown/unknown | 178/178              | 186/194 | 140/160 | 155/157 | 206/208 | 157/157 | 135/137 | 221/257 | 103/103 | 78/96 | 182/192 | 129/143 | 130/138 | 227/227 | GB14* |
| 102          | 1978/female     | 178/184              | 192/194 | 160/164 | 155/155 | 206/208 | 155/159 | 137/141 | 221/231 | 105/105 | 78/80 | 198/198 | 129/143 | 134/138 | 227/227 | GB19* |
| 103          | 1991/male       | 172/172              | 192/194 | 140/140 | 155/157 | 206/210 | 151/157 | 131/141 | 231/257 | 107/111 | 80/80 | 198/198 | 127/129 | 126/138 | 227/247 | GB19* |
| 104          | 1992/female     | 172/181              | 180/194 | 140/164 | 157/171 | 212/214 | 157/159 | 133/141 | 221/237 | 105/107 | 80/86 | 198/198 | 141/143 | 128/138 | 227/229 | GB19* |
| 105          | 1990/unknown    | 181/186              | 184/192 | 160/160 | 155/159 | 214/218 | 161/161 | 135/141 | 221/231 | 105/105 | 80/96 | 182/204 | 127/135 | 130/130 | 227/239 | GB10* |
| Hypothetical | Male            | 174/181              | 192/194 | 160/    | 157/    | 206/    | 153/    | 131/137 | 231/    | 103/111 | 96/   | 198/    | 129/139 | 128/130 | 227/    | ND    |

<sup>a</sup>ND = not done.

this study and that of Craighead et al. (1995) identified many related bears, but by no means fully characterized the populations. Fathers for about half of the offspring sampled were not identified in these studies. We identified the fathers of 8 of 18 (0.44) offspring with known mothers and Craighead et al. (1995) identified the fathers of 36 of 57 (0.63) offspring with known mothers in the western Brooks Range. It will be difficult to completely characterize relationships of highly mobile species such as grizzly bears.

There is considerable microsatellite allelic variation and heterozygosity at the microsatellite loci we used in grizzly bears in the Prudhoe Bay region ( $A = 6.6$ ,  $H = 70.2\%$ ; Table 1), the western Brooks Range ( $A = 7.6$ ,  $H = 74.7\%$ , for eight loci; Craighead et al. 1995), and in other mainland North American populations (mean  $A = 4.4$ – $7.6$ ,  $H = 55.3$ – $78.8\%$ ; Paetkau et al. 1998b). Comparison of the allele frequencies for the eight microsatellite loci analyzed for both the western Brooks Range (Craighead et al. 1995) and the Prudhoe Bay bears (Table 1) indicates there are many shared alleles and a relatively small genetic distance (Nei 1978) of 0.167. The three mtDNA haplotypes we observed, and others defined by additional substitutions within the 450 nucleotides sequenced, were also observed in northern Alaska grizzly bears by Talbot and Shields (1996b). They identified five haplotypes (including GB10, GB14, and GB19) among 19 bears from the western Brooks Range, and four haplotypes (including GB10 and GB19) among 17 bears from the Arctic National Wildlife Refuge east of the Prudhoe Bay region (Figure 1). The combined microsatellite and mtDNA data suggest there is gene flow between bears in the Prudhoe Bay region and adjacent areas.

The overall relatedness of individuals in different populations can also be assessed by comparing  $r_{xy}$  values. A relatively high  $r_{xy}$  for an entire population could indicate a large proportion of related individuals and the potential for inbreeding to occur. This is not apparent for any of three areas in northern Alaska for which microsatellite data are available. We calculated the mean  $r_{xy}$  values for eight microsatellite loci studied in three different areas of arctic Alaska using data from this study and Craighead (1994). Within each area mean  $r_{xy}$  values were close to 0: in the Prudhoe Bay region mean  $r_{xy}$  (sample size/standard deviation) =  $-0.0017$  (36/0.2434); in the

Arctic National Wildlife Refuge mean  $r_{xy}$  =  $-0.0019$  (15/0.1825); and in the western Brooks Range mean  $r_{xy}$  =  $-0.0002$  (149/0.2020). The mean  $r_{xy}$  values of about 0 and the high standard deviations reflect the presence of related and unrelated individuals in these populations, which is consistent with the high mobility of bears.

The grizzly bear population in the Prudhoe Bay region is genetically diverse and apparently has gene flow with neighboring areas. However, our analysis indicates that there are many related bears in the region, and that few adults have contributed a large percentage of the offspring produced in this area. The population genetic structure of bears in the region does not appear to differ appreciably from those in other areas. These results indicate that long-term study of both demography and genetics is necessary to understand the relationships of long-lived species with low reproductive rates, such as grizzly bears.

## References

- Allendorf FW, Christiansen FB, Dobson T, Eanes WF, and Frydenberg O, 1979. Electrophoretic variation in large mammals 1. The polar bear *Thalarctos maritimus*. *Hereditas* 91:19–22.
- Allendorf FW and Leary RF, 1986. Heterozygosity and fitness in natural populations of animals. In: *Conservation biology* (Soule M, ed). Sunderland, MA: Sinauer; 57–76.
- Amstrup SC, Garner GW, Cronin MA, and Patton JC, 1993. Sex identification of polar bears from blood and tissue samples. *Can J Zool* 71:2174–2177.
- Ballou J and Ralls K, 1982. Inbreeding and juvenile mortality in small populations of ungulates: a detailed analysis. *Biol Conserv* 24:239–272.
- Blouin MS, Parsons M, Lacaille V, and Lotz S, 1996. Use of microsatellite loci to classify individuals by relatedness. *Mol Ecol* 5:393–401.
- Carr SM and Marshall HD, 1991. Detection of intraspecific DNA sequence variation in the mitochondrial cytochrome *b* gene of Atlantic cod (*Gadus morhua*) by the polymerase chain reaction. *Can J Fish Aquat Sci* 48:48–52.
- Chakravarti A and Li CC, 1983. The effect of linkage on paternity calculations. In: *Inclusion probabilities in parentage testing* (Walker RH, ed). Arlington, VA: American Association of Blood Banks; 411–422.
- Craighead L, 1994. Conservation genetics of grizzly bears (PhD dissertation). Bozeman: Montana State University.
- Craighead L, Paetkau D, Reynolds HV, Vyse ER, and Strobeck C, 1995. Microsatellite analysis of paternity and reproduction in arctic grizzly bears. *J Hered* 86: 255–261.
- Cronin MA, Amstrup SC, Garner GW, and Vyse ER, 1991a. Interspecific and intraspecific mitochondrial DNA variation in North American bears (*Ursus*). *Can J Zool* 69:2985–2992.
- Cronin MA, Palmisciano DA, Vyse ER, and Cameron DG, 1991b. Mitochondrial DNA in wildlife forensic science: species identification of tissues. *Wildl Soc Bull* 19:94–105.
- Harris RB and Allendorf FW, 1989. Genetically effective population size of large mammals: an assessment of estimators. *Conserv Biol* 3:181–191.
- Knight RR, Blanchard BM, and Eberhardt LL, 1988. Mortality patterns and population sinks for Yellowstone grizzly bears. *Wildl Soc Bull* 16:121–125.
- Larsen T, Tegelstrom H, Kumar Juneja R, and Taylor MK, 1983. Low protein variability and genetic similarity between populations of the polar bear (*Ursus maritimus*). *Polar Res* 1:97–105.
- Nei M, 1978. Estimation of average heterozygosity and genetic distance from a small number of individuals. *Genetics* 89:583–590.
- Nei M and Roychoudhury AK, 1974. Sampling variances of heterozygosity and genetic distance. *Genetics* 76: 379–390.
- Paetkau D, Shields GF, and Strobeck C, 1998a. Gene flow between insular, coastal and interior populations of brown bears in Alaska. *Mol Ecol* 7:1283–1292.
- Paetkau D, Waits LP, Clarkson PL, Craighead L, and Strobeck C, 1997. An empirical evaluation of genetic distance statistics using microsatellite data from bear (*Ursidae*) populations. *Genetics* 147:1943–1957.
- Paetkau D, Waits LP, Clarkson PL, Craighead L, Vyse ER, Ward R, and Strobeck C, 1998b. Variation in genetic diversity across the range of North American brown bears. *Conserv Biol* 12:418–429.
- Pamilo P, 1989. Estimating relatedness in social groups. *Trends Ecol Evol* 4:353–355.
- Pemberton JM, Albon SD, Guinness FE, Clutton-Brock TH, and Dover GA, 1992. Behavioral estimates of male mating success tested by DNA fingerprinting in a polygynous mammal. *Behav Ecol* 3:66–75.
- Queller DC and Goodnight KF, 1989. Estimating relatedness using genetic markers. *Evolution* 43:258–275.
- Saiki RK, Gelfand DH, Stoffel S, Scharf SJ, Higuchi R, Horn GT, Mullis KB, and Erlich HA, 1988. Primer-directed enzymatic amplification of DNA with a thermostable DNA polymerase. *Science* 239:487–491.
- Shideler R and Hechtel J, in press. Grizzly bear. In: *The natural history of an arctic oil field: development and biota* (Truett J, ed). New York: Academic Press.
- Shields GF and Kocher TD, 1991. Phylogenetic relationships of North American ursids based on analysis of mitochondrial DNA. *Evolution* 45:218–221.
- Stoneberg RP and Jonkel CJ, 1966. Age determination of black bear by cementum layers. *J Wildl Manage* 30: 411–414.
- Swofford DL and Selander RB, 1981. BIOSYS-1: a FORTRAN program for comprehensive analysis of electrophoretic data in population genetics and systematics. *J Hered* 72:281–283.
- Taberlet P and Bouvet J, 1994. Mitochondrial DNA polymorphism, phylogeography, and conservation genetics of the brown bear *Ursus arctos* in Europe. *Proc R Soc Lond B* 255:195–200.
- Taberlet P, Mattock H, Dubois-Paganon C, and Bouvet J, 1993. Sexing free-ranging brown bears *Ursus arctos* using hairs found in the field. *Mol Ecol* 2:399–403.
- Talbot SL and Shields GF, 1996a. A phylogeny of the bears (*Ursidae*) inferred from complete sequences of three mitochondrial genes. *Mol Phylog Evol* 5:567–575.
- Talbot SL and Shields GF, 1996b. Phylogeography of brown bears (*Ursus arctos*) of Alaska and parapatry within the *Ursidae*. *Mol Phylog Evol* 5:477–494.
- Wiig O, Derocher AE, Cronin MA, and Skaare JU, 1998. Female pseudohermaphrodite polar bears at Svalbard. *J Wildl Dis* 34:792–796.
- Zhang Y and Ryder OA, 1993. Mitochondrial DNA sequence evolution in the Arctoidea. *Proc Natl Acad Sci USA* 90:9557–9561.

Received December 28, 1998

Accepted May 31, 1999

Corresponding Editor: Stephen J. O'Brien
